# Supplementary material for: Novel TiO2/graphene oxide functionalized with a cobalt complex for significant degradation of NOx and CO
Source: Royal Society of Chemistry journal article supplement (doi:10.1039/c5ra13620b), 2015-01-01
Supplement: c5ra13620b1.pdf [file c5ra13620b1.pdf]

## TiO<sub>2</sub>/Graphene Oxide Modified with Cobalt as a High-Performance Photocatalyst for NO<sub>x</sub> and CO removal from air

N. Seifvand<sup>a</sup>, E. Kowsari <sup>a\*</sup>

<sup>a</sup> Department of Chemistry, Amirkabir University of Technology, Hafez Avenue, No. 424, Tehran, Iran,  
Fax: +98(21)64543296, Tel.: +98(21)64543295, E-mail: kowsarie@aut.ac.ir

### Supplementary Figures, Table of Contents

|         |                                                                                       |
|---------|---------------------------------------------------------------------------------------|
| Fig. S1 | Functionalization reaction of GO with imidazole                                       |
| Fig. S2 | Schematic diagram of cobalt tetrakis imidazole complex formation at the surface of GO |
| Fig. S3 | Schematic layers arrangement of the FGO/TiO <sub>2</sub> composite photocatalyst      |
| Fig. S4 | Schematic laboratory setup of photocatalytic test measurements                        |
| Fig. S5 | Schematic effect of FGO on charge separation of the photocatalyst                     |

### Supplementary Information Table of Contents

|          |                                                                                                                            |
|----------|----------------------------------------------------------------------------------------------------------------------------|
| Table S1 | The experimental results of NO photodegradation over time and summary of the statistical analysis on TiO <sub>2</sub>      |
| Table S2 | The experimental results of NO photodegradation over time and summary of the statistical analysis on TiO <sub>2</sub> /GO  |
| Table S3 | The experimental results of NO photodegradation over time and summary of the statistical analysis on TiO <sub>2</sub> /FGO |
| Table S4 | The experimental results of CO photodegradation over time and summary of the statistical analysis on TiO <sub>2</sub>      |
| Table S5 | The experimental results of CO photodegradation over time and summary of the statistical analysis on TiO <sub>2</sub> /GO  |
| Table S6 | The experimental results of CO photodegradation over time and summary of the statistical analysis on TiO <sub>2</sub> /GO  |

**Fig. S1**

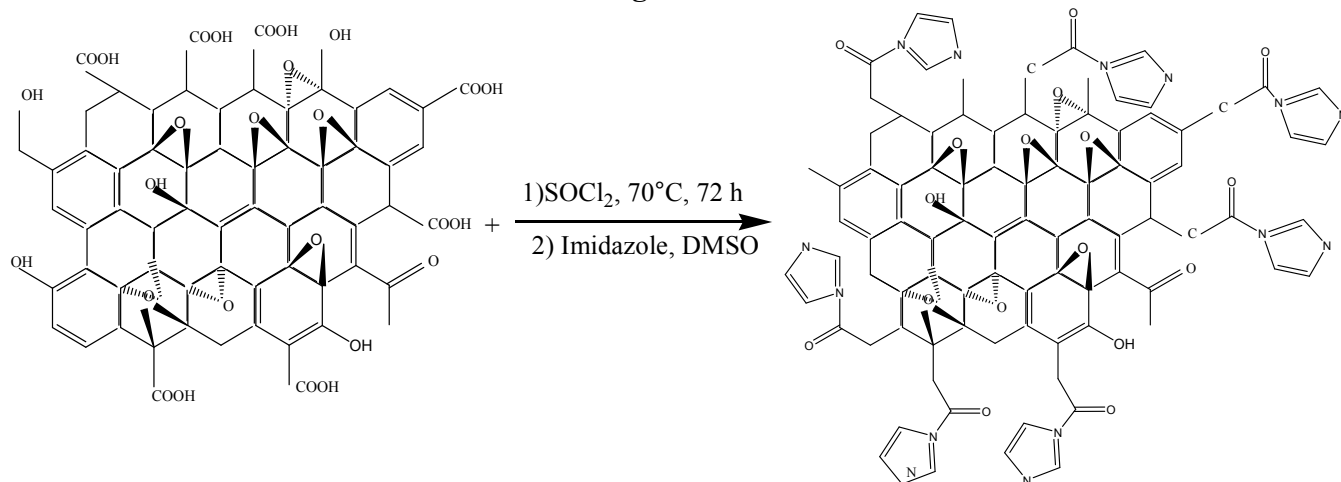

Fig. S1. Functionalization reaction of GO with imidazole

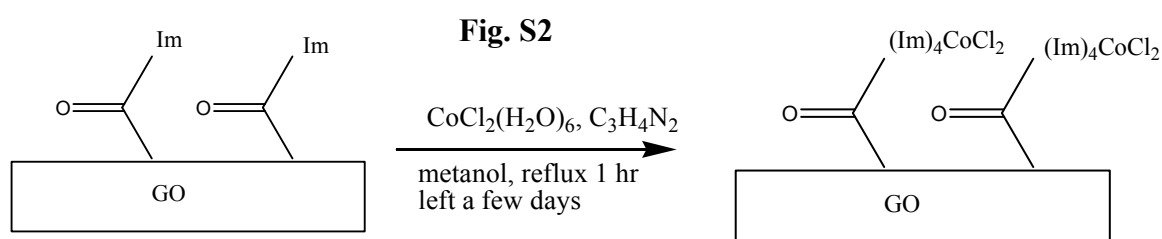

Fig. S2. Schematic diagram of cobalt tetrakis imidazole complex formation at the surface of GO

**Fig. S3**

### Functionalized Graphene Oxide

### TiO<sub>2</sub> Thin Film

### Quartz Substrate

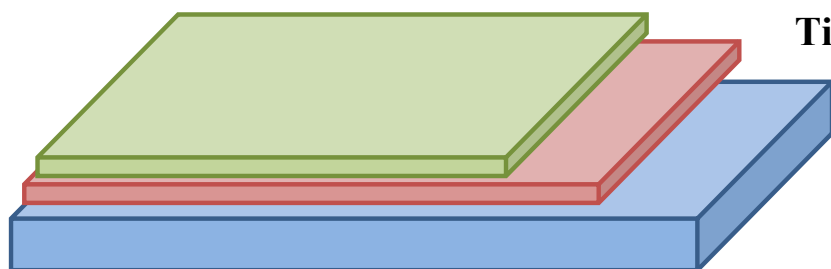

Fig. S3. Schematic layers arrangement of the FGO/TiO<sub>2</sub> composite photocatalyst

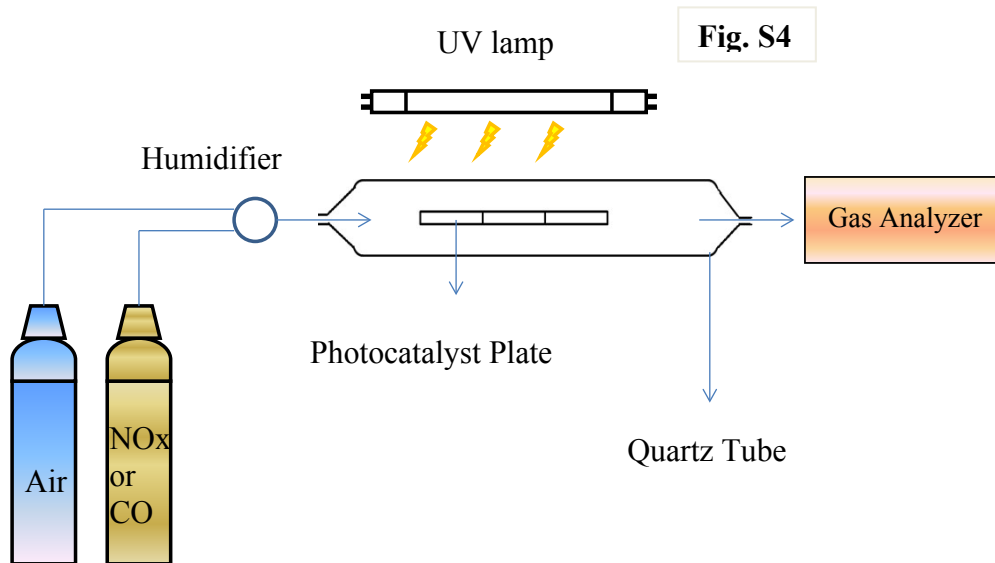

Fig. S4. Schematic laboratory setup of photocatalytic test measurements

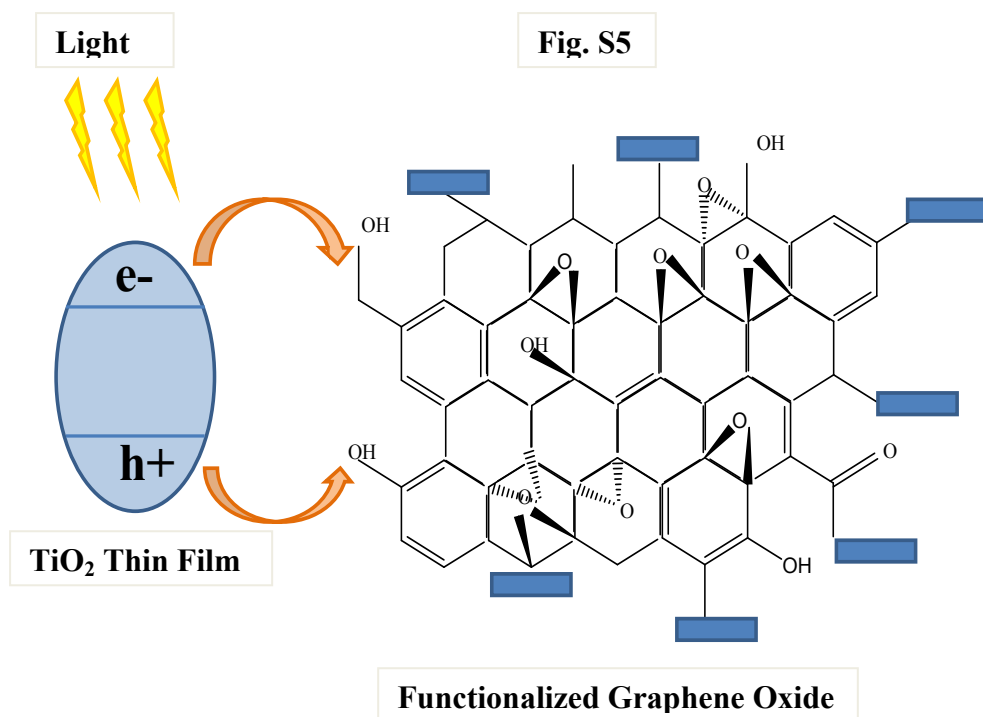

Fig. S5. Schematic effect of FGO on charge separation of the photocatalyst

**Table S1.**

| Time (min) | Series 1 | Series 2 | Series 3 | Series 4 | Average | C/C0   | C/C0% | SD   | RSD  |
|------------|----------|----------|----------|----------|---------|--------|-------|------|------|
| 0          | 998.91   | 999.58   | 998.60   | 997.56   | 998.66  | 998.66 | 0.99  | 0.84 | 0.08 |
| 10         | 972.25   | 971.21   | 969.54   | 971.25   | 971.06  | 971.06 | 0.97  | 1.12 | 0.12 |
| 20         | 951.01   | 953.02   | 952.36   | 950.51   | 951.73  | 951.73 | 0.95  | 1.16 | 0.12 |
| 30         | 932.52   | 933.68   | 930.87   | 932.25   | 932.33  | 932.33 | 0.93  | 1.15 | 0.12 |
| 40         | 910.21   | 909.65   | 908.45   | 911.21   | 909.88  | 909.88 | 0.91  | 1.15 | 0.13 |
| 50         | 905.25   | 901.24   | 902.58   | 904.03   | 903.28  | 903.28 | 0.90  | 1.74 | 0.19 |
| 60         | 890.28   | 891.47   | 893.32   | 894.13   | 892.30  | 892.30 | 0.89  | 1.75 | 0.20 |
| 70         | 880.18   | 882.23   | 884.12   | 881.11   | 881.91  | 881.91 | 0.88  | 1.70 | 0.19 |
| 80         | 879.15   | 876.65   | 877.23   | 879.78   | 878.20  | 878.20 | 0.88  | 1.50 | 0.17 |
| 90         | 871.65   | 870.21   | 872.58   | 869.15   | 870.90  | 870.90 | 0.87  | 1.52 | 0.17 |
| 100        | 861.24   | 863.69   | 865.59   | 865.35   | 863.97  | 863.97 | 0.86  | 2.01 | 0.23 |
| 110        | 851.21   | 851.36   | 852.75   | 853.98   | 852.33  | 852.33 | 0.85  | 1.30 | 0.15 |
| 120        | 841.25   | 840.15   | 838.14   | 837.74   | 839.32  | 839.32 | 0.84  | 1.66 | 0.20 |

**Table S2.**

| Time (min) | Series 1 | Series 2 | Series 3 | Series 4 | Average | C/C0   | C/C0% | SD   | RSD  |
|------------|----------|----------|----------|----------|---------|--------|-------|------|------|
| 0          | 998.89   | 997.02   | 998.72   | 997.98   | 998.15  | 998.15 | 1.00  | 0.85 | 0.09 |
| 10         | 952.01   | 951.31   | 948.65   | 947.62   | 949.90  | 949.90 | 0.95  | 2.10 | 0.22 |
| 20         | 902.10   | 901.56   | 901.27   | 905.32   | 902.56  | 902.56 | 0.90  | 1.87 | 0.21 |
| 30         | 871.23   | 872.34   | 874.62   | 871.23   | 872.36  | 872.36 | 0.87  | 1.60 | 0.18 |
| 40         | 862.11   | 861.28   | 859.06   | 858.74   | 860.30  | 860.30 | 0.86  | 1.65 | 0.19 |
| 50         | 832.23   | 831.41   | 829.78   | 834.12   | 831.89  | 831.89 | 0.83  | 1.80 | 0.22 |
| 60         | 811.15   | 809.22   | 810.34   | 812.30   | 810.75  | 810.75 | 0.81  | 1.30 | 0.16 |
| 70         | 782.68   | 781.66   | 782.33   | 778.47   | 781.29  | 781.29 | 0.78  | 1.92 | 0.25 |
| 80         | 751.12   | 752.10   | 751.03   | 748.69   | 750.74  | 750.74 | 0.75  | 1.45 | 0.19 |
| 90         | 721.09   | 722.38   | 720.15   | 718.55   | 720.54  | 720.54 | 0.72  | 1.61 | 0.22 |
| 100        | 702.22   | 701.36   | 698.77   | 699.28   | 700.41  | 700.41 | 0.72  | 1.65 | 0.24 |
| 110        | 697.33   | 698.36   | 698.70   | 694.31   | 697.18  | 697.18 | 0.70  | 2.00 | 0.29 |
| 120        | 692.01   | 691.33   | 690.77   | 688.02   | 690.53  | 690.53 | 0.69  | 1.75 | 0.25 |

**Table S3.**

| Time (min) | Series 1 | Series 2 | Series 3 | Series 4 | Average | C/C0   | C/C0% | SD   | RSD  |
|------------|----------|----------|----------|----------|---------|--------|-------|------|------|
| 0          | 997.89   | 998.02   | 997.72   | 998.98   | 998.15  | 998.15 | 0.99  | 0.57 | 0.06 |
| 10         | 902.22   | 905.67   | 901.47   | 903.99   | 903.34  | 903.34 | 0.90  | 1.88 | 0.21 |
| 20         | 850.09   | 851.77   | 848.10   | 852.36   | 850.58  | 850.58 | 0.85  | 1.91 | 0.22 |
| 30         | 801.55   | 802.10   | 805.21   | 802.66   | 802.88  | 802.88 | 0.80  | 1.62 | 0.20 |
| 40         | 752.89   | 750.48   | 750.39   | 748.30   | 750.52  | 750.52 | 0.75  | 1.88 | 0.25 |
| 50         | 702.63   | 702.99   | 701.01   | 704.55   | 702.80  | 702.80 | 0.70  | 1.45 | 0.21 |
| 60         | 661.20   | 662.31   | 664.77   | 660.36   | 662.16  | 662.16 | 0.66  | 1.91 | 0.29 |
| 70         | 602.32   | 601.27   | 600.15   | 603.85   | 601.90  | 601.90 | 0.60  | 1.57 | 0.26 |
| 80         | 551.39   | 550.09   | 551.64   | 552.73   | 551.46  | 551.46 | 0.55  | 1.08 | 0.20 |
| 90         | 521.00   | 518.98   | 517.44   | 520.86   | 519.57  | 519.57 | 0.52  | 1.69 | 0.33 |
| 100        | 509.02   | 512.23   | 511.63   | 508.61   | 510.37  | 510.37 | 0.51  | 1.82 | 0.36 |
| 110        | 501.20   | 501.63   | 500.01   | 498.26   | 500.28  | 500.28 | 0.50  | 1.51 | 0.30 |
| 120        | 498.35   | 499.66   | 498.22   | 497.33   | 498.39  | 498.39 | 0.50  | 0.96 | 0.19 |

**Table S4.**

| Time (min) | Series 1 | Series 2 | Series 3 | Series 4 | Average | C/C0    | C/C0% | SD   | RSD  |
|------------|----------|----------|----------|----------|---------|---------|-------|------|------|
| 0          | 50.00    | 49.85    | 49.90    | 49.75    | 49.88   | 0.9975  | 0.99  | 0.10 | 0.21 |
| 10         | 49.85    | 49.20    | 48.75    | 48.96    | 49.19   | 0.9838  | 0.98  | 0.48 | 0.97 |
| 20         | 49.56    | 48.96    | 48.25    | 49.16    | 48.98   | 0.97965 | 0.98  | 0.55 | 1.12 |
| 30         | 48.10    | 48.15    | 48.96    | 47.66    | 48.22   | 0.96435 | 0.96  | 0.54 | 1.12 |
| 40         | 48.20    | 47.56    | 48.09    | 47.89    | 47.94   | 0.9587  | 0.96  | 0.28 | 0.59 |
| 50         | 48.02    | 47.55    | 48.01    | 47.59    | 47.79   | 0.95585 | 0.95  | 0.26 | 0.54 |
| 60         | 47.88    | 47.55    | 48.00    | 47.29    | 47.68   | 0.9536  | 0.95  | 0.32 | 0.68 |
| 70         | 47.52    | 47.45    | 47.92    | 47.02    | 47.48   | 0.94955 | 0.95  | 0.37 | 0.78 |
| 80         | 47.22    | 47.30    | 47.77    | 46.95    | 47.31   | 0.9462  | 0.95  | 0.34 | 0.72 |
| 90         | 47.01    | 46.71    | 46.28    | 46.81    | 46.70   | 0.93405 | 0.93  | 0.31 | 0.66 |
| 100        | 46.35    | 46.25    | 46.10    | 45.83    | 46.13   | 0.92265 | 0.92  | 0.23 | 0.49 |
| 110        | 45.69    | 45.88    | 45.56    | 45.69    | 45.71   | 0.9141  | 0.91  | 0.13 | 0.29 |
| 120        | 45.21    | 45.63    | 45.18    | 45.79    | 45.45   | 0.90905 | 0.91  | 0.30 | 0.67 |

**Table S5.**

| Time (min) | Series 1 | Series 2 | Series 3 | Series 4 | Average | C/C0   | C/C0% | SD   | RSD  |
|------------|----------|----------|----------|----------|---------|--------|-------|------|------|
| 0          | 49.95    | 49.92    | 49.80    | 50.00    | 49.92   | 0.9984 | 0.99  | 0.09 | 0.17 |
| 10         | 47.25    | 48.56    | 47.56    | 48.59    | 47.99   | 0.9598 | 0.96  | 0.69 | 1.43 |
| 20         | 46.12    | 45.85    | 46.23    | 45.84    | 46.01   | 0.9202 | 0.92  | 0.20 | 0.43 |
| 30         | 45.26    | 45.47    | 44.56    | 45.01    | 45.08   | 0.9015 | 0.90  | 0.39 | 0.87 |
| 40         | 44.12    | 44.43    | 43.12    | 43.66    | 43.83   | 0.8767 | 0.88  | 0.57 | 1.30 |
| 50         | 43.12    | 42.96    | 42.63    | 42.17    | 42.72   | 0.8544 | 0.85  | 0.42 | 0.98 |
| 60         | 42.11    | 41.58    | 41.96    | 41.58    | 41.81   | 0.8362 | 0.84  | 0.27 | 0.65 |
| 70         | 41.51    | 41.03    | 40.82    | 40.18    | 40.89   | 0.8177 | 0.82  | 0.55 | 1.35 |
| 80         | 39.02    | 40.56    | 39.33    | 39.92    | 39.71   | 0.7942 | 0.79  | 0.68 | 1.71 |
| 90         | 38.85    | 39.15    | 38.59    | 39.15    | 38.94   | 0.7787 | 0.78  | 0.27 | 0.69 |
| 100        | 38.12    | 38.45    | 37.81    | 38.67    | 38.26   | 0.7653 | 0.76  | 0.38 | 0.99 |
| 110        | 37.52    | 37.61    | 37.29    | 38.09    | 37.63   | 0.7526 | 0.75  | 0.34 | 0.89 |
| 120        | 37.05    | 36.82    | 36.73    | 37.26    | 36.97   | 0.7393 | 0.74  | 0.24 | 0.64 |

**Table S6.**

| Time (min) | Series 1 | Series 2 | Series 3 | Series 4 | Average | C/C0   | C/C0% | SD   | RSD  |
|------------|----------|----------|----------|----------|---------|--------|-------|------|------|
| 0          | 49.72    | 49.81    | 49.31    | 50.00    | 49.71   | 0.9942 | 0.99  | 0.29 | 0.59 |
| 10         | 46.10    | 46.21    | 46.23    | 45.02    | 45.89   | 0.9178 | 0.92  | 0.58 | 1.29 |
| 20         | 42.32    | 41.84    | 43.66    | 43.27    | 42.77   | 0.8555 | 0.86  | 0.84 | 1.96 |
| 30         | 41.28    | 41.55    | 40.99    | 40.07    | 40.97   | 0.8195 | 0.82  | 0.64 | 1.61 |
| 40         | 38.21    | 38.88    | 39.63    | 38.12    | 38.71   | 0.7742 | 0.77  | 0.70 | 1.81 |
| 50         | 33.88    | 35.15    | 35.62    | 36.14    | 35.20   | 0.7040 | 0.70  | 0.97 | 2.68 |
| 60         | 31.12    | 31.19    | 32.55    | 33.33    | 32.05   | 0.6410 | 0.64  | 1.08 | 1.88 |
| 70         | 31.41    | 29.06    | 31.17    | 30.20    | 30.46   | 0.6092 | 0.61  | 1.07 | 2.25 |
| 80         | 30.14    | 28.85    | 29.47    | 29.45    | 29.48   | 0.5896 | 0.59  | 0.53 | 1.79 |
| 90         | 29.41    | 27.77    | 27.33    | 28.46    | 28.24   | 0.5649 | 0.56  | 0.91 | 1.64 |
| 100        | 28.66    | 27.46    | 26.22    | 28.05    | 27.60   | 0.5520 | 0.55  | 1.04 | 1.27 |
| 110        | 27.25    | 27.08    | 26.55    | 27.31    | 27.05   | 0.5410 | 0.54  | 0.35 | 1.27 |
| 120        | 26.41    | 26.39    | 25.84    | 26.66    | 26.33   | 0.5265 | 0.53  | 0.35 | 1.31 |
